# Supplementary material for: Controlling the electro-mechanical performance of polypyrrole through 3- and 3,4-methyl substituted copolymers
Source: Royal Society of Chemistry journal article supplement (doi:10.1039/c5ra15587h), 2015-01-01
Supplement: c5ra15587h1.pdf [file c5ra15587h1.pdf]

# Controlling the Electroactive Performance of Polypyrrole through 3- and 3, 4- Methyl Substituted Copolymers.

Daniel Melling\*, Stephen A. Wilson, and Edwin W. H. Jager.

\*Corresponding author.

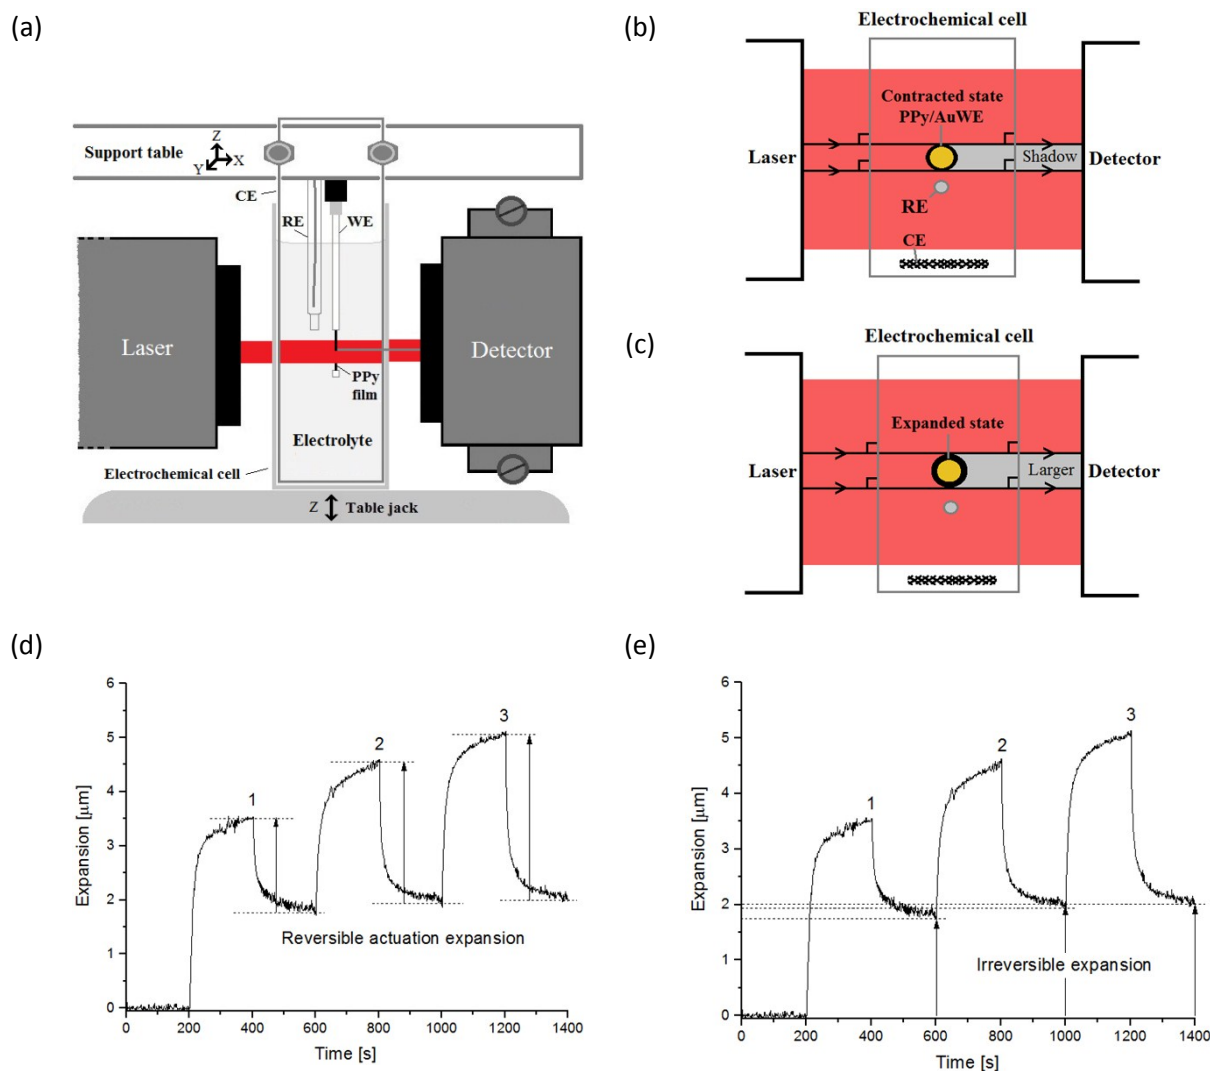

**Figure S1.** (a) Schematic of Laser Scanning Micrometry (LSM) setup for characterisation of electroactive performance showing a side view of the electrochemical cell and LSM micrometer. Schematics (plan view) showing the principle of LSM measurement: (b) contracted PPy film (c) expanded PPy film. (d) A typical actuation sequence for the first three cycles of PPy showing: (d) the reversible component of the expansion and (e) the irreversible component of the expansion.

| State of PPy(DBS)                                                                                                                              |                                                                                                                                                                                                                                                     |                                                                                                                                                                                                                                                                                                                 |                                                                                                                                                                                                                                                                                                                                   |
|------------------------------------------------------------------------------------------------------------------------------------------------|-----------------------------------------------------------------------------------------------------------------------------------------------------------------------------------------------------------------------------------------------------|-----------------------------------------------------------------------------------------------------------------------------------------------------------------------------------------------------------------------------------------------------------------------------------------------------------------|-----------------------------------------------------------------------------------------------------------------------------------------------------------------------------------------------------------------------------------------------------------------------------------------------------------------------------------|
| As-polymerized                                                                                                                                 | Expanded                                                                                                                                                                                                                                            | Fully oxidized                                                                                                                                                                                                                                                                                                  | Fully reduced                                                                                                                                                                                                                                                                                                                     |
| 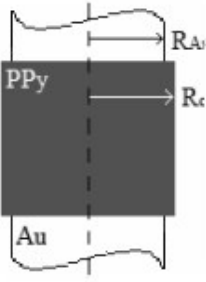 <p>Initial film thickness:<br/><math>R_o - R_{Au}</math></p> | 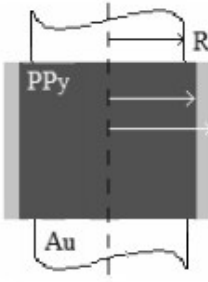 <p>Expansion:<br/><math>R - R_o</math></p> <p>Strain:<br/><math>(R - R_o)/(R_o - R_{Au})</math></p> <p>% Strain:<br/><math>100(R - R_o)/(R_o - R_{Au})</math></p> | 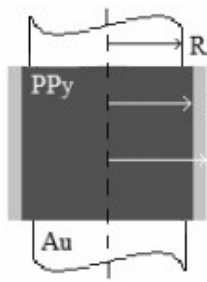 <p>Irreversible expansion:<br/><math>R_{oxid} - R_o</math></p> <p>Irreversible strain:<br/><math>(R_{oxid} - R_o)/(R_o - R_{Au})</math></p> <p>% Irreversible strain:<br/><math>100(R_{oxid} - R_o)/(R_o - R_{Au})</math></p> | 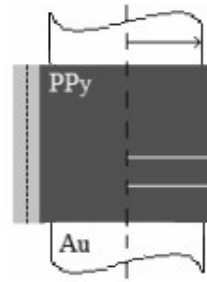 <p>Reversible expansion:<br/><math>R_{red} - R_{oxid}</math></p> <p>Reversible strain:<br/><math>(R_{red} - R_{oxid})/(R_{oxid} - R_{Au})</math></p> <p>% Reversible strain:<br/><math>100(R_{red} - R_{oxid})/(R_{oxid} - R_{Au})</math></p> |

**Figure S2.** Actuation metrics used to characterise actuation performance.

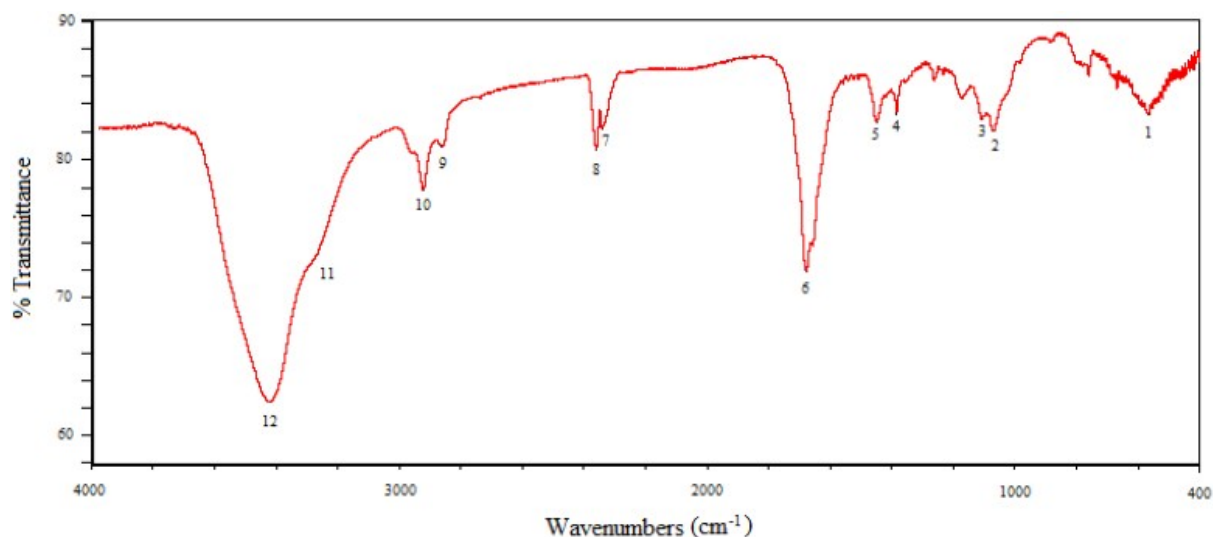

| Peak positions (cm <sup>-1</sup> ) | Peak intensity and description | Peak assignment                            |
|------------------------------------|--------------------------------|--------------------------------------------|
| 1384.32                            | Medium                         | 1395-1365: -CH <sub>3</sub> γ              |
| 1448.29                            | Medium                         | 1470-1430: -CH <sub>3</sub> δ              |
| 2863.05 and 2922.04                | Medium, possible multiplet     | 3100: pyrrollic CH stretch                 |
| 3250 (shoulder)                    | Strong                         | 3400-2800: pyrrollic NH (H-bonded) stretch |
| 3420.61                            | Strong, broad                  | 3500-3400: pyrrollic NH (free) stretch     |

**Figure S3.** FTIR spectrum of the product (3,4-dimethyl-1H-pyrrole) prepared as a KBr disc and potential peak assignments. Peak assignments were made using p. 301-303 of The Handbook of Infrared and Raman Characteristic Frequencies of Organic Molecules. Lin-Vien, D., Colthup, N. B., Fateley, W. G., Grasselli, J. G. (1991). Academic Press, San Diego, USA.

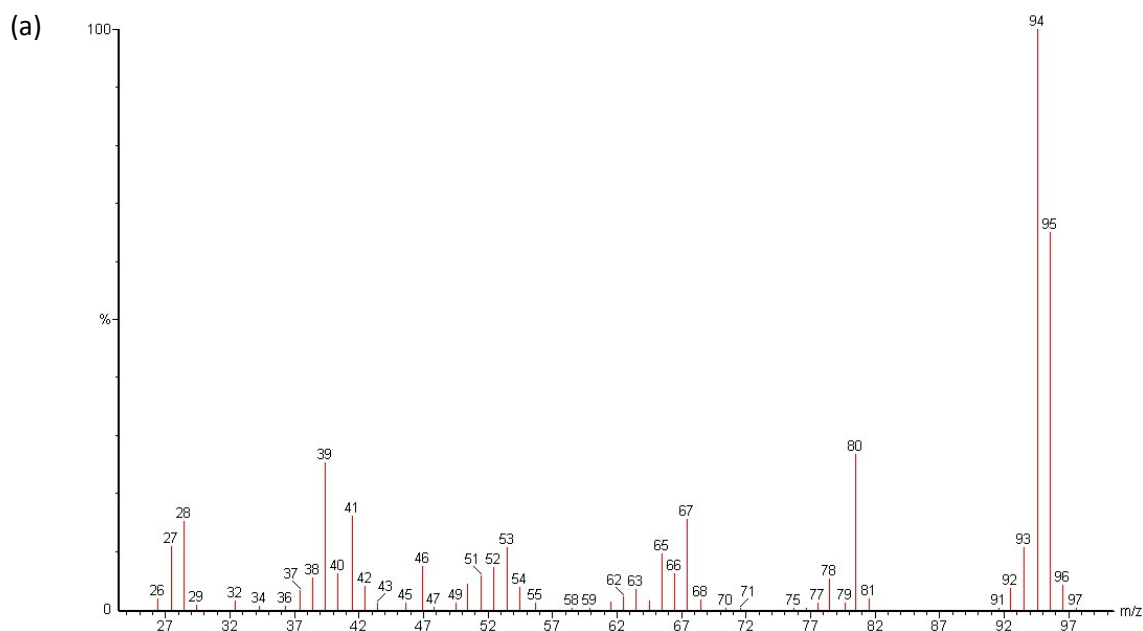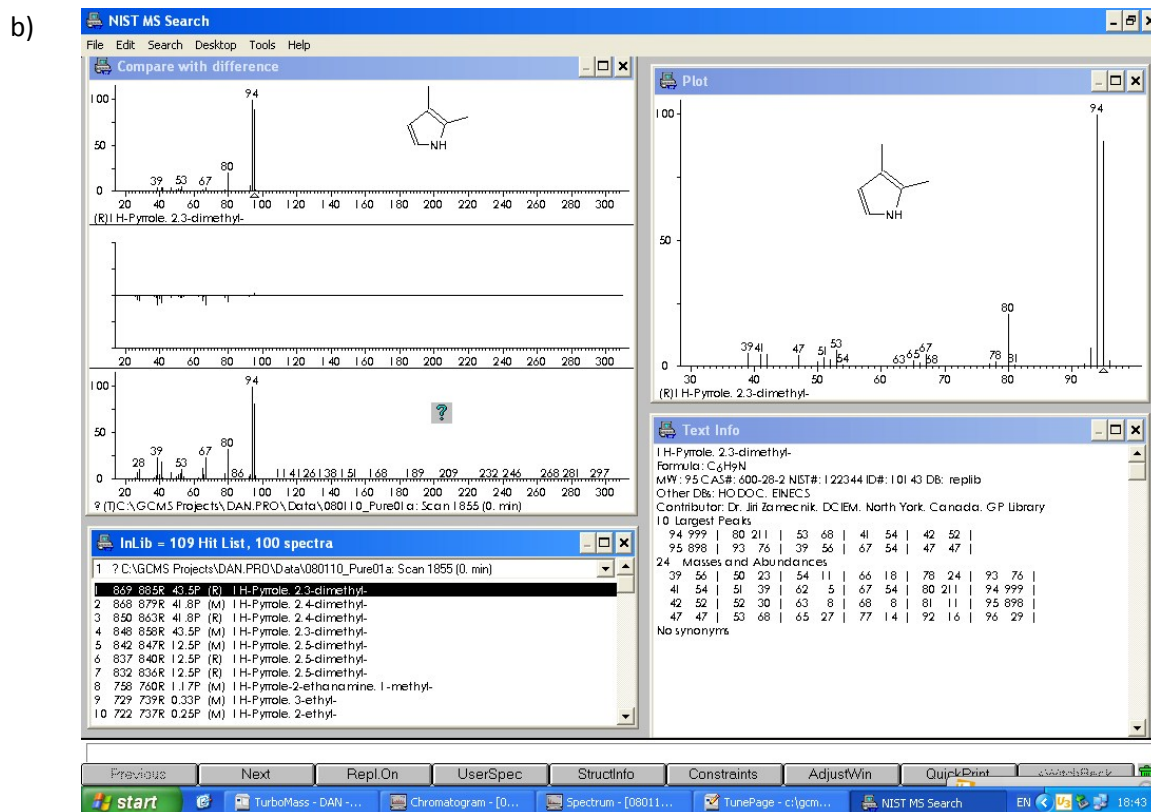

**Figure S4.** (a) Mass spectrum of the product (3,4-dimethyl-1H-pyrrole) displaying a peak corresponding with the molecular ion at  $m/z = 95$ . (b) NIST MS database search showing the closest matches for the product as the 2,3- and 2,4- isomers of dimethyl-1H-pyrrole. (Note: the 3,4- isomer was not in the NIST database and therefore an exact match was not possible).

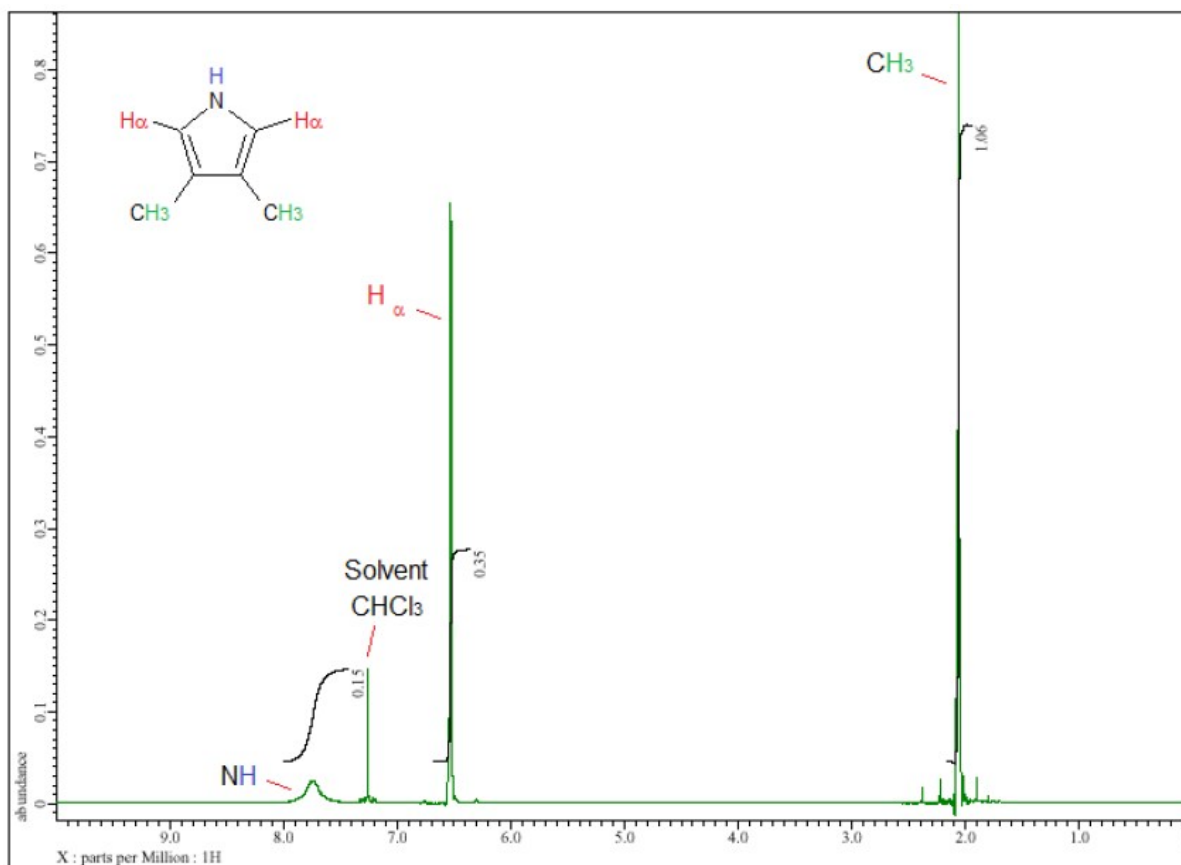

**Figure S5.**  $^1\text{H}$  NMR spectrum of the product (3,4-dimethyl-1H-pyrrole).

**Summary:**

$^1\text{H}$  NMR (400 MHz, CDCl $_3$ ,  $\delta$ ): 7.75 (s, br, 1H, NH), 6.53 (d,  $J$  = 2.52 Hz, 2H, C $_{\alpha}$ ), 2.05 (s, 6H; CH $_3$ ).

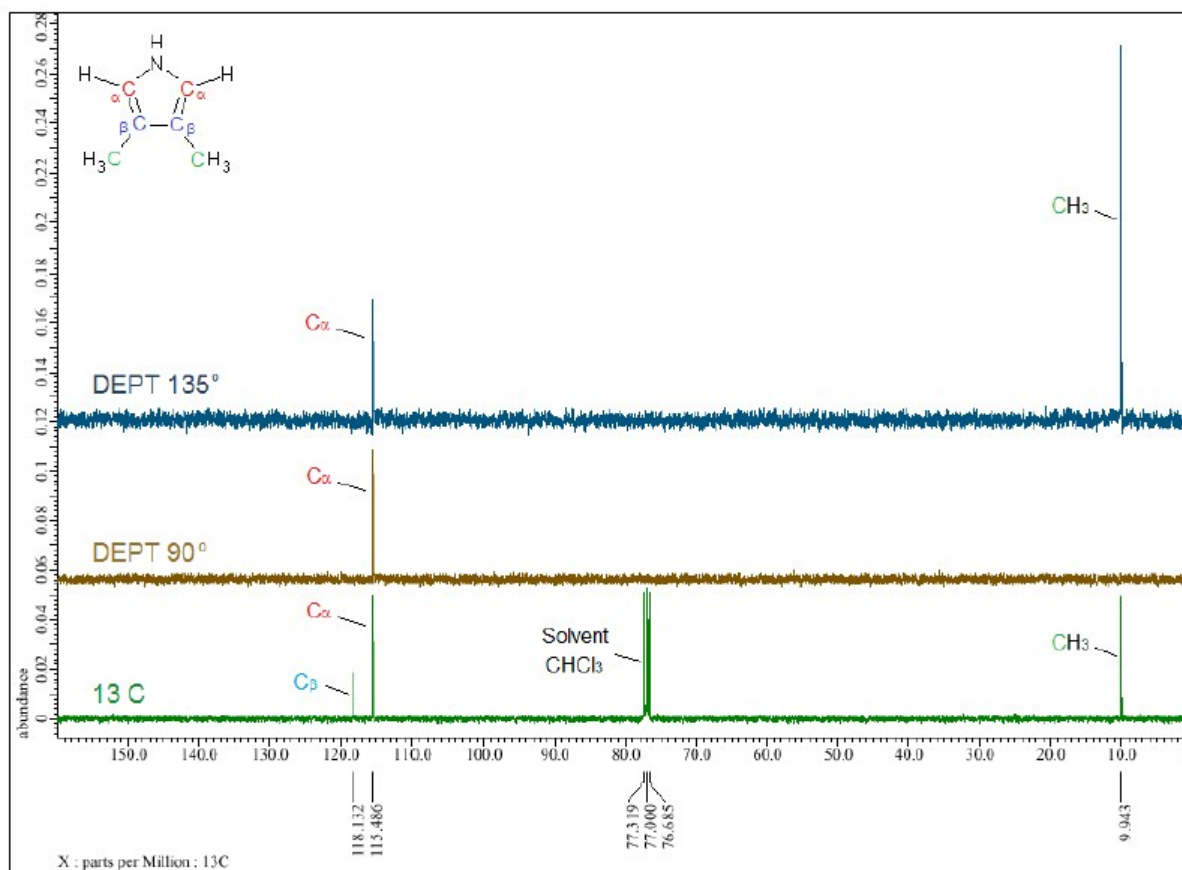

**Figure S6.**  $^{13}\text{C}$  NMR and Distortionless Enhancement by Polarization Transfer (DEPT 90° and 135°)  $^{13}\text{C}$  NMR spectra of the product (3,4-dimethyl-1H-pyrrole).

**Summary:**

$^{13}\text{C}$  NMR (400 MHz, CDCl $_3$ ,  $\delta$ ): 118.13 (C $\beta$ ), 115.49 (C $\alpha$ ), 9.94 (CH $_3$ ).

| ELEMENT   | C     | H    | N     | $\Sigma$ | Difference |
|-----------|-------|------|-------|----------|------------|
| % Theory  | 75.74 | 9.53 | 14.71 | 100.00   | N/A        |
| % Found 1 | 75.74 | 9.52 | 14.90 | 100.16   | 0.16       |
| % Found 2 | 75.73 | 9.51 | 14.83 | 100.07   | 0.07       |

**Figure S7.** Confirmation of the purity of 3,4-dimethyl-1H-pyrrole by CHN Elemental analysis.

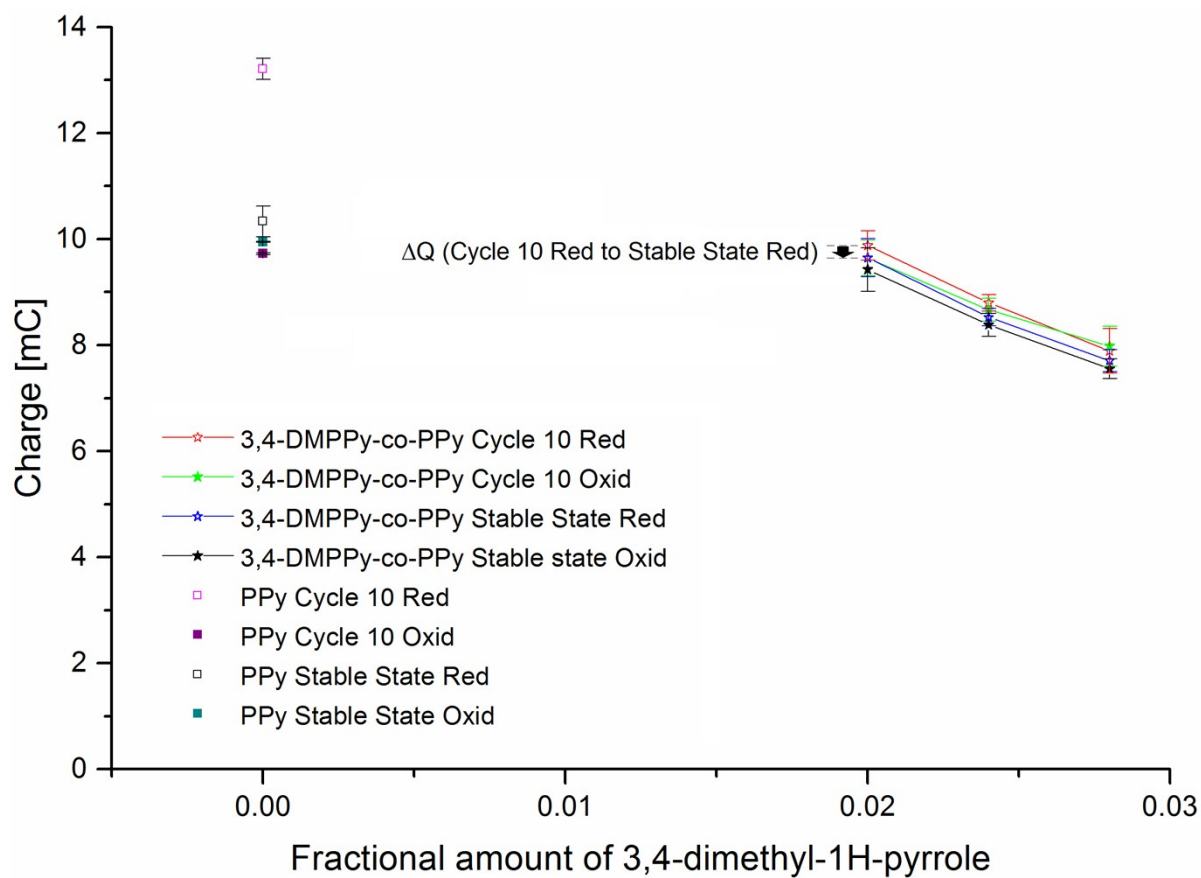

**Figure S8** Charge consumed by 5  $\mu\text{m}$  films of PPy(DBS) and poly(3,4-DMPy-co-Py)(DBS) whilst actuating (-1V, 200 s and 0V, 200 s) during cycle 10 and the stable state. Note: there is essentially no change in charge ( $\Delta Q$ ) between cycle 10 and the stable state for poly(3,4-DMPy-co-Py)(DBS).
